# Deletion of the mitochondrial matrix protein cyclophilin-D prevents parvalbumin interneuron dysfunction and cognitive deficits in a mouse model of NMDA hypofunction

Aarron Phensy<sup>1</sup>, Kathy L. Lindquist<sup>1</sup>, Karen A. Lindquist<sup>1</sup>, Dania Bairuty<sup>1</sup>, Esha Gauba<sup>2</sup>, Lan Guo<sup>2</sup>, Jing Tian<sup>2</sup>, Heng Du<sup>2</sup>, and Sven Kroener<sup>1</sup>

**Abbreviated title:** CypD deletion reduces oxidative stress in PVI

<sup>1</sup> School of Behavioral and Brain Sciences, The University of Texas at Dallas, Richardson, TX 75080

<sup>2</sup> Department of Biological Sciences, The University of Texas at Dallas, Richardson, TX 75080

**Correspondence should be addressed to:**

Sven Kroener, PhD  
School of Behavioral and Brain Sciences,  
The University of Texas at Dallas,  
800 West Campbell Rd, BSB14  
Richardson, TX 75080  
Email: kroener@utdallas.edu  
Phone: 972-883-2039  
Fax: 972-883- 3491

**Number of pages:** 24

**Number of figures:** 6

**Number of tables:** 0

**Number of multimedia:** 0

**Number of words in the abstract:** 217

**Number of words in the introduction:** 648

**Number of words in the discussion:** 1499

**Author contributions:** AP, HD, and SK designed the research; AP, KLL, KAL, DB, EG, LG, JT, HD, and SK performed research; AP, LG, HD, and SK analyzed data; AP and SK wrote the paper.

**Conflict of Interest:** The authors report no conflict of interest.

**Funding sources:** AP is supported by NIH (F31MH118883). SK wishes to acknowledge support from The University of Texas at Dallas and NIH (R01AG053588). HD is supported by NIH (R01AG053588; R00AG037716).

1 **Abstract**

2 Redox dysregulation and oxidative stress are final common pathways in the pathophysiology of  
3 a variety of psychiatric disorders, including schizophrenia. Oxidative stress causes dysfunction  
4 of GABAergic parvalbumin-positive interneurons (PVI), which are crucial for the coordination of  
5 neuronal synchrony during sensory- and cognitive-processing. Mitochondria are the main  
6 source of reactive oxygen species (ROS) in neurons and they control synaptic activity through  
7 their roles in energy production and intracellular calcium homeostasis. We have previously  
8 shown that in male mice transient blockade of NMDA receptors during development  
9 (subcutaneous injections of 30 mg/kg ketamine (KET) on postnatal days 7, 9, and 11) results in  
10 long-lasting alterations in synaptic transmission and reduced parvalbumin expression in the  
11 adult prefrontal cortex (PFC), contributing to a behavioral phenotype that mimics multiple  
12 symptoms associated with schizophrenia. These changes correlate with oxidative stress and  
13 impaired mitochondrial function in both PVI and pyramidal cells. Here, we show that genetic  
14 deletion (*Ppif*<sup>-/-</sup>) of the mitochondrial matrix protein cyclophilin D (CypD) prevents perinatal KET-  
15 induced increases in ROS and the resulting deficits in PVI function, and changes in excitatory  
16 and inhibitory synaptic transmission in the PFC. Deletion of CypD also prevented KET-induced  
17 behavioral deficits in cognitive flexibility, social interaction, and novel object recognition. Taken  
18 together, these data highlight how mitochondrial activity may play an integral role in modulating  
19 PVI-mediated cognitive processes.

20 **Significance Statement**

21 Mitochondria are important modulators of oxidative stress and cell function, yet how  
22 mitochondrial dysfunction affects cell activity and synaptic transmission in psychiatric illnesses  
23 is not well understood. NMDA receptor blockade with ketamine during development causes  
24 oxidative stress, dysfunction of parvalbumin-positive interneurons (PVI), and long-lasting  
25 physiological and behavioral changes. Here we show that mice deficient for the mitochondrial  
26 matrix protein cyclophilin D show robust protection from PVI dysfunction following perinatal  
27 NMDAR-blockade. Mitochondria serve as an essential node for a number of stress-induced  
28 signaling pathways and our experiments suggest that failure of mitochondrial redox regulation  
29 can contribute to PVI dysfunction.

## 30 Introduction

31 Schizophrenia is a neurodevelopmental disorder in which genetic risk factors and early life  
32 stressors converge (Harrison and Owen, 2003). Genes involved in glutamatergic synaptic  
33 transmission figure prominently among both the rare (Timms et al., 2013; Pocklington et al.,  
34 2015; Sekar et al., 2016) and common (Pers et al., 2016) gene variants that contribute to the  
35 heritable risk for schizophrenia. In the frontal cortex, these genes are highly expressed early in  
36 development (Gulsuner et al., 2013; Birnbaum et al., 2015). Dysfunction of glutamatergic  
37 NMDARs during neurodevelopment can disrupt maturation of interneurons (Zhang and Sun,  
38 2011) and cause abnormalities in the GABAergic and dopaminergic systems in schizophrenia  
39 (Olney et al., 1999; Krystal et al., 2002; Catts et al., 2013). Aberrant NMDAR activity can  
40 therefore shift the cortical excitation-inhibition (E/I) balance (Insel, 2010; Lewis et al., 2012),  
41 leading to increased basal neural activity (Jadi et al., 2016), excessive glutamatergic release  
42 (Plitman et al., 2014), and oxidative stress (Hardingham and Do, 2016; Steullet et al., 2016). In  
43 support of this, NMDAR antagonists such as phencyclidine and ketamine (KET) induce a  
44 schizophrenia-like syndrome in healthy subjects, and exacerbate symptoms in schizophrenic  
45 patients (Malhotra et al., 1997; Krystal et al., 2002; Anticevic et al., 2012). Pharmacological  
46 blockade or genetic deletion of NMDARs in rodents mimics many of the behavioral symptoms  
47 seen in patients with schizophrenia, and it also reduces markers of GABAergic interneurons,  
48 including cells that express the calcium-binding protein parvalbumin (Abekawa et al., 2007;  
49 Braun et al., 2007; Belforte et al., 2010). Reductions in parvalbumin expression are a core  
50 finding of post-mortem studies in schizophrenia patients (Olney et al., 1999; Lewis et al., 2005;  
51 Akbarian and Huang, 2006) that is replicated by virtually all animal models of the disease (Jiang  
52 et al., 2013; Steullet et al., 2017). Fast-spiking PVI have a unique metabolic profile that is  
53 reflected in a large number of mitochondria and enriched cytochrome c oxidase (Kann and  
54 Kovacs, 2007), which seems to make them particularly susceptible to external stressors during  
55 development (Hardingham and Do, 2016; Steullet et al., 2017).

56 Mitochondria are crucial regulators of oxidative and nitrosative stress (Chen et al., 2003; Li et  
57 al., 2004), and transcriptomic, proteomic, and metabolomic studies in post-mortem samples  
58 from subjects with schizophrenia indicate alterations in the expression of several proteins  
59 associated with mitochondrial function (Prabakaran et al., 2004; Altar et al., 2005; Iwamoto et  
60 al., 2005; Hjelm et al., 2015). Altered levels of ATP and mitochondrial dysfunction in the frontal  
61 lobe are correlated with negative symptoms, as well as cognitive and memory deficits in  
62 schizophrenia (Ben-Shachar and Laifenfeld, 2004; Rajasekaran et al., 2015). Oxidative and  
63 other cellular stresses promote translocation of the mitochondrial matrix protein cyclophilin D  
64 (CypD) to the inner membrane. This translocation triggers the opening of the mitochondrial  
65 permeability transition pore (mPTP) (Connern and Halestrap, 1994; Baines et al., 2005), which  
66 is important in glutamate excitotoxicity that results from overactivation of glutamate receptors  
67 and subsequent excessive calcium entry into the cell (Schinder et al., 1996; White and  
68 Reynolds, 1996). Prolonged CypD-mediated opening of mPTP causes collapsed mitochondrial  
69 membrane potential, elevated mitochondrial ROS generation, and lowered ATP production,  
70 leading to metabolic changes and ultimately cell death (Basso et al., 2005; Halestrap, 2010).  
71 Because CypD is a necessary component of the mPTP, reducing CypD translocation in order to  
72 block mPTP formation can preserve mitochondrial function (Du and Yan, 2010).

73 Here, we investigated whether genetic deletion of CypD (*Ppif*<sup>-/-</sup>) can prevent changes in PVI  
74 function, PFC physiology, and behavior that develop in a well-characterized rodent model of  
75 NMDA hypofunction. Perinatal treatment with ketamine induced oxidative stress and reduced  
76 PV expression in the PFC of wildtype- but not of *Ppif*<sup>-/-</sup> mice. CypD-deletion similarly protected  
77 against changes in glutamatergic transmission at PVI and deficits in cognitive flexibility, social  
78 interaction, and novel object recognition. These data indicate that mitochondrial redox regulation  
79 is an important contributor to PVI dysfunction and the resulting E/I imbalance that results from  
80 NMDAR-hypofunction.

81

## 82 **Materials and Methods**

83 Transgenic *Ppif*<sup>-/-</sup> mice: Cyclophilin-D knockout mice (B6;129-*Ppif*<sup>tm1Jmol</sup>/J; The Jackson  
84 Laboratory; RRID:IMSR\_JAX:009071), were crossed with G42 mice (CB6-Tg[Gad1-  
85 EGFP]G42Zjh/J; The Jackson Laboratory; RRID:IMSR\_JAX:007677) which express GFP in PVI  
86 neurons, in order to identify PV+ neurons in slice electrophysiology experiments. First- and  
87 second-generation breeders were selected and their WT (CB6-TgWT; Gad1-EGFP) and *Ppif*<sup>-/-</sup>  
88 (CB6-Tg*Ppif*<sup>-/-</sup>; Gad1-EGFP) offspring were used for experiments. All procedures were  
89 approved by the Institutional Animal Care and Use Committee of The University of Texas at  
90 Dallas.

91 Perinatal ketamine treatment: On postnatal day 7, 9, and 11 mice received subcutaneous  
92 injections of either saline or a sub-anesthetic dose of the NMDA-antagonist ketamine (30mg/kg;  
93 Ketathesia HCL, Henry Schein). Both *Ppif*<sup>-/-</sup> and WT mice received either perinatal ketamine  
94 (KET) or saline injections, creating four groups: Wild type mice that received saline injections  
95 (WT-SAL); Wild type mice that received ketamine injections (WT-KET); *Ppif*<sup>-/-</sup> mice that received  
96 saline injections (*Ppif*<sup>-/-</sup>-SAL); and *Ppif*<sup>-/-</sup> mice that received ketamine treatment (*Ppif*<sup>-/-</sup>-KET). All  
97 experiments were performed on adult male *Ppif*<sup>-/-</sup> and WT mice (60-120 days old). Animals that  
98 participated in behavioral experiments were handled for 5 minutes a day in the vivarium for 2  
99 weeks prior to the test and then also in the room in which behavioral testing took place for 3  
100 days prior to the test. On the day of testing, animals were transferred to the behavioral room at  
101 least 30 min before testing began. Behavioral testing and analysis was performed by  
102 experimenters blind to the experimental condition of the subjects.

103 Immunohistochemistry: Animals were perfused transcardially with saline for 2 minutes, followed  
104 by 4% paraformaldehyde in 0.12 M phosphate-buffered saline (PBS), at 4°C, pH 7.4; Fisher  
105 Scientific) for 10 minutes using a peristaltic pump (5.5 ml/min; PeriStar Pro, WPI). Brains were  
106 post-fixated in paraformaldehyde with 30% sucrose for 1 h and then transferred to 30% sucrose  
107 in PBS for 18 h at 4°C. Coronal slices (40 um) were cut on a freezing microtome. Free-floating  
108 sections were incubated in rabbit anti-parvalbumin (1:2000 working dilution; Swant Cat# PV 25,  
109 RRID:AB\_10000344) in PBS and 0.3% Triton X (Sigma-Aldrich) for 36 h at 4°C. Sections were  
110 washed three times for 10 min each in PBS before they were incubated in secondary 594 goat  
111 anti-rabbit (1:1000 working dilution; Jackson ImmunoResearch Labs Cat# 111-585-144,  
112 RRID:AB\_2307325) in PBS and 0.3% Triton X. Sections were washed, mounted, and cover  
113 slipped using Prolong Gold Antifade with DAPI (Thermo Fisher Scientific). To quantify PVI  
114 immunofluorescence a minimum of four sections from each animal containing the prelimbic and  
115 infralimbic regions of the PFC were imaged on a confocal microscope (FluoView 1000,  
116 Olympus) at 20x magnification. The number of PV+ cells were hand counted in ImageJ  
117 (National Institutes of Health), and DAPI-labeled cells were counted using the thresholding  
118 function in ImageJ to obtain the percentage of total PV+ cells among all DAPI-labeled cells. In  
119 order to quantify 4-Hydroxynonenal (4-HNE) levels in PVI free-floating sections were incubated  
120 in rabbit anti-parvalbumin (1:2000 working dilution; Swant Cat# PV 25, RRID:AB\_10000344)  
121 and mouse anti-4HNE (1:1000 working dilution; Abcam Cat# ab48506, RRID:AB\_867452) in  
122 PBS and 0.3% Triton X (Sigma-Aldrich) for 36 h at 4°C. Sections were washed three times for  
123 10 min each in PBS before they were incubated in secondary 488 goat anti-rabbit (1:1000  
124 working dilution; Jackson ImmunoResearch Labs Cat# 111-095-144, RRID:AB\_2337978) and

125 647 goat anti-mouse (1:500 working dilution; Cell Signaling Technology Cat# 4410,  
126 RRID:AB\_1904023) in PBS and 0.3% Triton X. To quantify 4HNE in PVI cells PVI  
127 immunofluorescence confocal images (20x magnification) from three sections of the prelimbic  
128 and infralimbic cortex were taken for each animal. ROIs were drawn around all PV+ cells in  
129 cellSens (Olympus cellSens Software, RRID:SCR\_016238) and the mean gray intensity of the  
130 4HNE signal for each cell was selected and averaged across each image and then across all  
131 three slices for every animal.

132 GSH:GSSG Assay: In order to measure the ratio between reduced glutathione (GSH) and  
133 oxidized glutathione (GSSG), GSH, GSSG, and total glutathione were measured following the  
134 manufacturer instructions (glutathione detection kit, catalog #ADI-900-160, Enzo Life Sciences).  
135 In brief, animals were killed and the medial PFC containing the infralimbic and prelimbic cortex  
136 was dissected and homogenized in ice-cold 5% (w/v) meta-phosphoric acid (20 ml/g tissue),  
137 followed by centrifugation at 12,000 x g for 10 min at 4C. The resultant supernatant was  
138 collected for glutathione detection. For the measurement of GSSG and total glutathione, 2 M 4-  
139 vinylpyridine was added to the samples at a dilution of 1:50 (v/v). The samples were then  
140 incubated for 1 h at room temperature to derivatize reduced glutathione. Afterward, the samples  
141 were diluted in the reaction mix buffer. The reaction was observed by immediately and  
142 continuously recording changes at an optical density of 405 nm by using a microplate reader  
143 (Biotek) for a total of 15 min at 1 min intervals. The concentrations of total, oxidized, and  
144 reduced glutathione were normalized to the original wet weight of the tissue.

145 Electrophysiology: Electrophysiological experiments used GFP+ hemizygous mice. Mice were  
146 anesthetized with urethane (3 g/kg body weight; Fisher Scientific) and transcardially perfused  
147 for one minute with gravity-fed ice-cold oxygenated (95% O<sub>2</sub>. 5% CO<sub>2</sub>) cutting ACSF,  
148 consisting of (in mM): 110 choline (Sigma-Aldrich), 25 NaHCO<sub>3</sub> (Fisher Scientific), 1.25  
149 NaH<sub>2</sub>PO<sub>4</sub> (Fisher Scientific), 2.5 KCl (Sigma-Aldrich), 7 MgCl<sub>2</sub> (Sigma-Aldrich), 0.5 CaCl<sub>2</sub>  
150 (Sigma-Aldrich), 10 dextrose (Fisher Scientific), 1.3 L-ascorbic acid (Fisher Scientific), and 2.4  
151 Na<sup>+</sup>- pyruvate (Sigma-Aldrich). Immediately after, brains were extracted and coronal sections  
152 (350 μm) of the frontal cortex were cut on a vibratome (VT1000S, Leica) in cutting ACSF. Slices  
153 were transferred into a holding chamber containing warmed (35C) recording ACSF and cooled  
154 to room temperature over a one-hour period. The recording ACSF consisted of (in mM): 126  
155 NaCl (Fisher Scientific), 25 NaHCO<sub>3</sub>, 1.25 NaH<sub>2</sub>PO<sub>4</sub>, 2.5 KCl, 2 MgCl<sub>2</sub>, 2 CaCl<sub>2</sub>, 10 dextrose,  
156 2.4 Na<sup>+</sup>-pyruvate, and 1.3 L-ascorbic acid. For data collection, slices were transferred to a  
157 recording chamber affixed to an Olympus BX61WI microscope (Olympus) with continuous  
158 perfusion of oxygenated recording ACSF at room temperature. Whole-cell voltage-clamp  
159 recordings were obtained from pyramidal cells and PVIs in the prelimbic and infralimbic cortex  
160 using an Axon Multiclamp 700B amplifier (Molecular Devices). Data were acquired and  
161 analyzed using AxoGraph X (AxoGraph Scientific). Recording electrodes (WPI; 3–5 MΩ open  
162 tip resistance for pyramidal cells, 6–8 MΩ for interneurons) were filled with an internal solution  
163 consisting of (in mM): 130 CsCl (Sigma-Aldrich), 20 tetraethylammonium chloride (Sigma-  
164 Aldrich), 10 HEPES (Sigma-Aldrich), 2 MgCl<sub>2</sub>, 0.5 EGTA (Sigma-Aldrich), 4 Mg<sup>2+</sup>-ATP (Sigma-  
165 Aldrich), 0.3 Lithium-GTP (Sigma-Aldrich), 14 phosphocreatine (Sigma-Aldrich), and 2 QX-314  
166 bromide (Tocris Bioscience). Theta-glass pipettes (Warner Instruments) connected to a stimulus  
167 isolator (WPI) were used for focal stimulation of synaptic potentials. Access resistance was



168 monitored throughout the recording, and a <20% change was deemed acceptable.  
169 Spontaneous EPSCs were isolated by blocking chloride channels with the addition of picrotoxin  
170 (75uM; Sigma-Aldrich) into the recording ACSF. Spontaneous IPSCs were isolated by blocking  
171 AMPA receptor-mediated events with CNQX (6-cyano-7-nitroquinoxaline-2,3-dione; 20uM;  
172 Sigma-Aldrich). Miniature events were isolated by blocking sodium channels with the addition of  
173 tetrodotoxin (1uM; Alomone Labs). The frequency and amplitude of events were measured from  
174 200 s of continuous recording using MiniAnalysis (Synaptosoft) with a threshold set at two times  
175 the RMS baseline noise. The ratio of currents through NMDA or AMPA receptors, respectively,  
176 was obtained by clamping cells at +40mv holding potential and applying local electrical  
177 stimulation. A compound evoked EPSC (eEPSC) was first recorded, then the AMPA component  
178 was isolated by washing CPP ((+/-)-3-(2-carboxypiperazin-4-yl)propyl-1-phosphonic acid; 10  
179 uM; Sigma-Aldrich) into the bath. A minimum of 15 sweeps each were average for the  
180 compound and AMPA-only eEPSCs. The NMDA component was then obtained by digital  
181 subtraction of the AMPA component from the compound trace. The peak amplitude of the  
182 NMDA and AMPA traces were used to calculate the NMDAR/AMPA ratio.

183 Rule-Shifting: Procedures for our rule-shifting task followed those previously described (Phensy  
184 et al., 2017b). Mice were food restricted to 85% of their free-feeding weight over two weeks and  
185 handled for at least 5 minutes a day. Testing took place in white wooden plus maze (each arm  
186 is 10x34x15 cm, with a 10x10 cm center area) under low ambient illumination. The arms were  
187 labeled East, West, South, and North for reference. On days 4-6, the maze was converted into a  
188 T-maze by blocking off one of the arms with a divider, and additionally a visual cue (vertical  
189 black and white stripes on a 13x10 cm plastic sheet) was placed alternately near the entrance of  
190 one of the two choice arms in a pseudorandom manner (see below). During all days, reward  
191 pellets (Cheerio bits) were placed around the outside of the maze in order to prevent animals  
192 from using olfactory cues to infer the location of the reward. Mice were habituated to the maze  
193 over three days. On the first day of habituation, 4 reward pellets (1/8th Cheerios bits) were  
194 placed in each of the arms of the plus maze. Animals were placed into the center of the maze  
195 and were allowed to freely explore the maze for 15 minutes. If a mouse consumed all 16 pellets  
196 before the end of the habituation period, it was briefly placed in a holding cage while the maze  
197 was rebaited, and then the mouse was placed back into the maze until the end of the 15-minute  
198 period. On the second day of habituation, arms were baited with two pellets each, and on the  
199 third day of habituation only one food pellet was placed at the end of each arm. To reach  
200 habituation criterion, animals were required to consume all 4 food pellets at least 4 times within  
201 the 15-minute period. All animals in this study reached this criterion on the third habituation day.  
202 On the following day (Day 4), the plus maze was converted into a T-maze by blocking off one of  
203 the arms and the animals' turn bias was determined. Therefore, mice were placed in the stem  
204 arm and allowed to turn left or right to obtain a food pellet. After the mouse consumed the  
205 reward, it was returned to the stem arm and allowed to make another choice. If the mouse  
206 chose the same arm as on the initial choice, it was returned to the stem arm until it chose the  
207 other arm and consumed the food pellet. Once both food pellets were consumed the maze was  
208 rebaited and the next trial began. The direction of the initial turn chosen four or more times over  
209 seven trials was considered the turn bias. On the next day (Day 5, Response Discrimination),  
210 mice were trained on an egocentric task which required them to always turn towards one side  
211 (left or right, chosen opposite to the direction of their turn bias) to obtain the food reward. The



212 location of the stem arm was pseudorandomly rotated among 3 arms (East, West, and South) to  
213 discourage mice from using an allocentric spatial strategy. During all trials a visual cue was  
214 placed close to the entrance of one of the choice arms. Placement of this cue into the right or  
215 left arm varied pseudorandomly to balance the frequency of occurrences in each arm across  
216 blocks of 12 consecutive trials. Similarly, the order of the stem arms alternated pseudorandomly  
217 in a balanced fashion across blocks of 12 trials. Training continued until the mouse made 9  
218 correct choices over 10 consecutive trials. When animals achieved this acquisition criterion, a  
219 probe trial was administered. In the probe trial the previously unused fourth arm (North) was  
220 used as a stem arm. If the mice performed the probe trial correctly, Response Discrimination  
221 training was completed. If an incorrect turn occurred, response training continued until the  
222 mouse made another five consecutive correct choices, and then another probe trial was  
223 administered. On the next day (Day 6, Shift-to-Visual-Cue Discrimination), mice were trained to  
224 shift their strategy to now select the choice arm with the visual cue in order to obtain food  
225 rewards. The location of the visual cue and the position of the start arm were again varied  
226 pseudorandomly so that their frequency was balanced across blocks of 12 consecutive trials.  
227 The training and response criteria for the Shift-to-Visual-Cue Discrimination were identical to  
228 those during Response Discrimination. Performance and Error Analysis: For each of the two  
229 test days we analyzed the total number of trials to criterion and the number of probe trials  
230 required to reach criterion. For the Shift-to-Visual-Cue Discrimination, errors were scored as  
231 entries into arms that did not contain the visual cue, and they were further broken down into  
232 three subcategories to determine whether the animals' treatment altered the ability to either shift  
233 from the previously learned strategy (perseverative errors), or to maintain the new strategy after  
234 perseveration had ceased (regressive errors, or never-reinforced errors). In order to detect  
235 shifts in the strategies that animals used, trials were separated into consecutive blocks of four  
236 trials each. A perseverative error occurred when a mouse made the same egocentric response  
237 as required during the Response Discrimination, but which was opposite to the direction of the  
238 arm containing the visual cue. Six of every 12 consecutive trials required the mouse to respond  
239 in this manner. A perseverative error was scored when the mouse entered the incorrect arm on  
240 three or more trials per block of 4 trials. Once the mouse made less than three perseverative  
241 errors in a block, all subsequent errors of the same type were now scored as regressive errors  
242 (because at this point the mouse was following an alternative strategy at least half of the time).  
243 So-called never-reinforced errors were scored when a mouse entered the incorrect arm on trials  
244 where the visual cue was placed on the same side that the mouse had been trained to enter on  
245 the previous day.

246 Novel Object Recognition: Testing was conducted in a white wooden open chamber (39 x 19 x  
247 30.5 cm) and sessions were recorded from above by a web camera for later analysis. Wooden  
248 toys (approximately 3 x 5 cm) were used as stimulus objects and pseudorandomly selected as  
249 either the familiar or novel objects. In addition, in a different cohort of mice object preference  
250 was measured prior to experiments to ensure mice showed no inherent preference across the  
251 objects used. Mice were first habituated for 10 minutes on two consecutive days to the empty  
252 chamber. On the third day mice were again habituated for 10 minutes before the training and  
253 test trials begun. Therefore, mice were placed in their home cage while the chamber was  
254 cleaned and two objects were placed inside the chamber. Mice were then placed inside the  
255 chamber and allowed to investigate the two objects for 3 minutes before being placed back into

256 the home cage for a 2-minute intertrial interval during which one of the two familiar objects was  
257 replaced with a novel object. After 2 minutes mice were placed back into the chamber and  
258 allowed to explore both the familiar and novel object for an additional 2 minutes. The objects  
259 were cleaned with 20% ethanol and the chamber was cleaned with 70% ethanol between  
260 animals. The amount of time the mice spent investigating the objects during both the training  
261 trial and the novel object trial were analyzed. In order to assess whether animals recognized the  
262 novel object as such we calculated a “recognition index”, which is the percentage of time spent  
263 investigating the novel object over the total investigation time for both objects.

264 Social Interaction: Experimental mice and two size- and age-matched stimulus mice were  
265 housed individually for three days prior to the task. On the day of the test, the experimental  
266 mouse was placed into a new cage with 2.5 grams of their original bedding material to allow the  
267 animal to habituate for one hour. Stimulus mice were kept in a small custom cylindrical holding  
268 apparatus (height 20 cm, steel bars separated by 1 cm, acrylic base and lid), which could be  
269 placed inside the test cage. After one hour, the first stimulus mouse was placed in the holding  
270 apparatus and positioned into the cage with the test mouse for a trial interval of 1-minute while  
271 being recorded by an overhead camera. This was repeated for four trials with an intertrial  
272 interval of 10 minutes (Trials 1-4). On the fifth trial, a novel stimulus mouse was introduced into  
273 the cage to test for social recognition memory. All trials were recorded via an overhead camera  
274 and the interaction times (defined as sniffing and investigation of the stimulus mouse at close  
275 proximity) were analyzed for each trial.

276 Statistical Analysis: Differences between groups were compared using one-way ANOVAs or  
277 two-way mixed ANOVAs as indicated. Post-hoc analyses using Tukey correction were used to  
278 determine specific group differences. All data is presented as mean  $\pm$  standard error of the  
279 mean (SEM). An alpha level of  $p < 0.05$  was considered significant.

## 280 **Results**

### 281 Perinatal KET-treatment reduces parvalbumin expression in adult mPFC in WT, but not in *Ppif*<sup>-/-</sup> 282 mice

283 A reduction in the number of parvalbumin-expressing interneurons (PVI) is a hallmark of  
284 schizophrenia (Lewis et al., 2005; Nakazawa et al., 2012) that is recapitulated by most animal  
285 models, including perinatal KET application (Jeevakumar et al., 2015; Phensy et al., 2017a). To  
286 determine if genetic deletion of Cyclophilin D can protect against KET-induced reductions in  
287 PVI, we performed immunohistochemistry and quantified the number of parvalbumin+ somata in  
288 the mPFC from both adult WT and *Ppif*<sup>-/-</sup> mice which received either KET or saline during  
289 development (Fig. 1). A one-way ANOVA revealed a main effect of treatment on the number of  
290 PV+ cells over the number of DAPI+ cells ( $F_{(3, 30)} = 8.990$ ,  $p < 0.001$ ). Wildtype KET-treated  
291 mice showed a significant loss in PV expression. In contrast, *Ppif*<sup>-/-</sup>-KET mice were protected  
292 against KET-induced PVI loss and had similar numbers of PV+ cells than saline-control mice  
293 (Fig. 1B).

### 294 Ketamine-induced oxidative stress is reduced in *Ppif*<sup>-/-</sup> mice

295 Perinatal ketamine treatment leads to long-lasting increases in oxidative stress in adult animals,  
296 and PVI are particularly sensitive to redox dysregulation (Do et al., 2009; Phensy et al., 2017a).  
297 The ratio between the bioavailable reduced (GSH) and unavailable oxidized (GSSG) forms of  
298 the endogenous antioxidant glutathione provides a measure of redox balance in cells. A  
299 decrease in this ratio indicates a disruption in redox balance and subsequent oxidative stress.  
300 To determine if genetic deletion of cyclophilin D prevents KET-induced oxidative stress, we first  
301 measured levels of GSH and GSSG in mPFC tissue taken from adult mice (Fig. 2). A one-way  
302 ANOVA revealed that while there was no effect of treatment on total glutathione levels ( $F_{(3, 14)} =$   
303  $1.172$ ,  $p = 0.3556$ ; Fig. 2A), there was a main effect of treatment on the ratio of GSH / GSSG  
304 ( $F_{(3, 35)} = 6.664$ ,  $p = 0.001$ ; Fig. 2B), with WT-KET mice having a significantly reduced GSH /  
305 GSSG ratio, indicating increased oxidative stress in these animals. A similar reduction was not  
306 observed in *Ppif*<sup>-/-</sup>-KET mice. Next, we measured 4-HNE levels in PVI of the mPFC (Fig. 3). 4-  
307 HNE levels increase during periods of oxidative stress due to lipid peroxidation. We colocalized  
308 immunofluorescence signals of 4-HNE and parvalbumin to measure changes in 4-HNE  
309 specifically in PVI. A one-way ANOVA revealed a main effect of treatment on the mean grey  
310 intensity of 4-HNE in PVI ( $F_{(3, 27)} = 5.084$ ,  $p = 0.0064$ ; Fig. 3B). This effect was due to a  
311 significant increase in 4-HNE signal in WT-KET mice, which was not present in *Ppif*<sup>-/-</sup>-KET or  
312 saline-control mice. Taken together, these results show that PVI in the mPFC of *Ppif*<sup>-/-</sup> mice are  
313 protected from KET-induced oxidative stress.

### 314 Perinatal KET-treatment alters inhibitory synaptic transmission onto layer 2/3 mPFC pyramidal 315 cells in WT, but not *Ppif*<sup>-/-</sup> mice

316 GABAergic PVI inhibit nearby pyramidal neurons and regulate synchronized firing (Sohal and  
317 Rubenstein, 2019). Loss of PVI function leads to reduced GABAergic activity onto pyramidal  
318 neurons resulting in disinhibited circuits. In order to determine if CypD deletion prevents KET-  
319 induced disinhibition of pyramidal cells, we performed whole cell patch-clamp recordings in layer  
320 2/3 pyramidal neurons of the mPFC and quantified the frequency and amplitude of both  
321 spontaneous (sIPSCs) and miniature inhibitory postsynaptic currents (mIPSCs) (Fig. 4). We

322 found a significant main effect of treatment on the frequency of mIPSCs ( $F_{(3, 28)} = 6.547$ ,  $p =$   
323  $0.002$ ; Fig. 4C), but no effect on amplitude ( $F_{(3, 28)} = 1.689$ ,  $p = 0.192$ ; Fig. 4C). Post-hoc  
324 analyses revealed that this was driven by a selective decrease in mIPSC frequency in WT-KET  
325 mice. Similar changes did not occur in *Ppif*<sup>-/-</sup>-KET or saline-control mice. KET-treatment did not  
326 alter the frequency ( $F_{(3, 22)} = 0.8743$ ,  $p = 0.469$ ; Fig. 4F) or the amplitude ( $F_{(3, 22)} = 1.289$ ,  $p =$   
327  $0.303$ ; Fig. 4F) of sIPSCs. These data suggest that KET reduces GABA release and that this  
328 can be prevented by CypD deletion.

#### 329 KET-treatment induces NMDAR hypofunction in layer 2/3 PVI from WT, but not *Ppif*<sup>-/-</sup> mice

330 NMDAR hypofunction likely contributes to aberrant network activity in schizophrenia (Snyder  
331 and Gao, 2013). Perinatal KET treatment disrupts PVI development in the mPFC, causing  
332 NMDAR hypofunction in adult layer 2/3 PVI (Jeevakumar and Kroener, 2016; Phensy et al.,  
333 2017a). In order to test whether CypD deletion can prevent KET-induced changes in NMDAR-  
334 signaling we next measured NMDAR and AMPAR currents in GFP+ PVI (Fig. 5A-B). A one-way  
335 ANOVA ( $F_{(3, 18)} = 4.280$ ,  $p = 0.019$ ; Fig. 5B) revealed a main effect of treatment on the ratio of  
336 NMDAR:AMPA currents at layer 2/3 PVI. Consistent with our previous reports (Jeevakumar  
337 and Kroener, 2016; Phensy et al., 2017a), WT-KET mice had significantly reduced  
338 NMDAR:AMPA ratios. In contrast, *Ppif*<sup>-/-</sup>-KET mice showed current ratios comparable to  
339 saline-treated controls, suggesting that genetic deletion of CypD offers protection from KET-  
340 induced aberrant NMDAR signaling in layer 2/3 PVI.

#### 341 KET-treatment alters spontaneous glutamate release onto layer 2/3 PVI from WT, but not *Ppif*<sup>-/-</sup> 342 mice

343 The KET-induced NMDAR hypofunction in layer 2/3 PVI is accompanied by disinhibition of  
344 pyramidal cells (as seen in Fig. 4), which subsequently causes increased glutamate release  
345 back onto PVI (Jeevakumar and Kroener, 2016; Phensy et al., 2017a). The increased activation  
346 of postsynaptic glutamate receptors may lead to excessive calcium influx and contribute to  
347 persistent mitochondrial stress in PVI (Phensy et al., 2017a). To further test if CypD deletion  
348 prevents KET-induced alterations in glutamatergic signaling at PVI, we recorded spontaneous  
349 excitatory postsynaptic currents (sEPSCs) in GFP+ PVI (Fig. 5C-D). A one-way ANOVA  
350 revealed a main effect of treatment on sEPSC frequency ( $F_{(3, 23)} = 5.812$ ,  $p = 0.004$ ; Fig. 5D),  
351 without significant changes in sEPSC amplitude ( $F_{(3, 20)} = 2.828$ ,  $p = 0.065$ ; Fig. 5D). Consistent  
352 with the idea that mPFC pyramidal cells from KET-treated mice are disinhibited, post-hoc  
353 analyses showed a selective increase in sEPSC frequency in PVI from WT-KET mice; a change  
354 that was not seen in any of the other treatment groups.

#### 355 KET-treatment induces deficits in cognitive flexibility, novel object recognition, and social 356 interactions in WT, but not in *Ppif*<sup>-/-</sup> mice

357 In order to determine the functional impact of the physiological changes that result from KET-  
358 treatment and CypD deletion, we tested adult mice in a battery of behavioral tasks. These tasks  
359 included a rule-shifting task to measure cognitive flexibility, a novel object recognition task which  
360 measures (short-term) memory for objects, and a social interaction task which tests deficits in  
361 social interaction and novelty discrimination (Fig. 6) (Jeevakumar et al., 2015; Phensy et al.,  
362 2017b).

### 363 Rule Shifting Task

364 Cognitive flexibility is the ability to inhibit the use of a defunct strategy and enable the learning of  
365 a new functional strategy. The PFC is important for the ability to shift between strategies, and  
366 dysfunctions of the PFC lead to perseveration on inappropriate responses. To examine if CypD  
367 deletion protects against KET-induced deficits in cognitive flexibility, we tested WT and *Ppif*<sup>-/-</sup>  
368 mice on a well-characterized rule-shifting task that is highly dependent on the mPFC (Birrell and  
369 Brown, 2000; Floresco and Magyar, 2006; Young et al., 2009; Hu et al., 2015; Jeevakumar and  
370 Kroener, 2016). Mice first learn an egocentric Response Discrimination strategy and then need  
371 to shift to a Visual-Cue Discrimination strategy. Mice in all treatment groups reached criterion for  
372 the Response Discrimination in the same number of trials ( $F_{(3, 26)} = 0.4760$ ,  $p = 0.702$ ; Fig. 6B).  
373 In contrast, a one-way ANOVA showed a main effect of treatment on the number of trials  
374 needed to reach criterion during the Shift-to-Visual Cue Discrimination phase of the task ( $F_{(3, 26)}$   
375  $= 9.576$ ,  $p < 0.001$ ; Fig. 6B). WT-KET mice took significantly more trials to reach criterion  
376 compared to mice in all other treatment groups. To further differentiate the effects of KET-  
377 treatment and CypD deletion on cognitive strategies, we analyzed the types of errors  
378 (perseverative, regressive, or never-reinforced) that mice committed. A one-way ANOVA ( $F_{(3, 26)}$   
379  $= 4.361$ ,  $p = 0.013$ ; Fig. 6C) revealed that KET-treatment caused significantly more overall  
380 errors in WT, but not *Ppif*<sup>-/-</sup> or saline-control mice. Furthermore, there was a significant effect of  
381 treatment on perseverative errors ( $F_{(3, 26)} = 3.152$ ,  $p = 0.042$ ; Fig. 6C), but not on regressive ( $F_{(3, 26)}$   
382  $= 1.867$ ,  $p = 0.160$ ; Fig. 6C), or never-reinforced errors ( $F_{(3, 26)} = 0.7296$ ,  $p = 0.544$ ; Fig. 6C).  
383 The significant effect on perseverative errors was due to a selective increase in the WT-KET  
384 mice which was not observed in KET-treated *Ppif*<sup>-/-</sup> or saline-control mice.

### 385 Novel Object Recognition

386 Mice, like humans, show preference for novel objects and spend more time investigating a novel  
387 object if they can correctly distinguish it from a previously encountered object. We next  
388 measured how KET treatment and CypD deletion affect novel object recognition (Fig. 6D-E).  
389 Preference for the novel object can be calculated as a recognition index, which is the time spent  
390 investigating the novel object as a percent of total time investigating both objects. A one-way  
391 ANOVA across treatment groups ( $F_{(3, 31)} = 6.375$ ,  $p = 0.002$ ; Fig. 6E) revealed a main effect of  
392 treatment on recognition index. WT-KET mice had reduced recognition indices; in contrast, *Ppif*<sup>-/-</sup>-KET  
393 exhibited normal novel object recognition and spent similar amounts of time as saline-  
394 controls investigating the novel object.

### 395 Social Interaction

396 Deficits in social cognition and interaction greatly impact the quality of life of patients with  
397 schizophrenia. KET-treated mice show reduced social interactions (Jeevakumar et al., 2015;  
398 Phensy et al., 2017b). To test if genetic deletion of CypD can prevent this social deficit, we  
399 performed a social interaction and recognition task (Fig. 6F-G). Mice initially show great interest  
400 anytime a new mouse is introduced into their home cage but gradually reduce their investigation  
401 time with repeated exposures (trials 1-4). This can be used to investigate differences in baseline  
402 social interaction and recognition memory when a new stimulus mouse is introduced into the  
403 cage (trial 5). A two-way mixed ANOVA, revealed a significant main effect of treatment ( $F_{(3, 32)} =$   
404  $7.954$ ,  $p < 0.001$ ; Fig. 6G) on social interaction. Consistent with our previous reports



405 (Jeevakumar et al., 2015; Phensy et al., 2017b), WT-KET mice showed reduced investigation  
406 times across trials 1, 2, and 5. In contrast, *Ppif*<sup>-/-</sup>-KET mice demonstrated investigation times  
407 similar to saline-treated controls across all five exposures, suggesting normal social interaction  
408 and recognition memory.

409

## 410 Discussion

411 NMDAR dysfunction disrupts normal development of GABAergic and glutamatergic networks  
412 and this may contribute to schizophrenia pathology (Krystal et al., 2002). Parvalbumin-  
413 expressing interneurons appear to be particularly susceptible to NMDAR dysfunction (Cohen et  
414 al., 2015), and changes in PVI and their synapses are well-documented in schizophrenia (Lewis  
415 et al., 2005; Nakazawa et al., 2012; Gonzalez-Burgos et al., 2015). PVI are highly sensitive to  
416 oxidative stress (Do et al., 2009), which can disrupt neuronal function and decrease NMDAR  
417 activity (Choi and Lipton, 2000). Mitochondria are the primary mediators of redox state (Rego  
418 and Oliveira, 2003; Bhatti et al., 2017) and they are abundant in PVI (Gulyas et al., 2006);  
419 however, their role in PVI dysfunction has received relatively little attention. Oxidative and other  
420 cellular stresses trigger translocation of CypD to the inner mitochondrial membrane, initiating  
421 formation of the mPTP (Baines et al., 2005). Prolonged mPTP formation leads to excessive  
422 levels of intracellular superoxide and pathological mitochondrial activity (Crompton, 2004;  
423 Lemasters et al., 2009). Glutamate excitotoxicity that results from overactivation of NMDA  
424 receptors and excessive calcium entry is a well-established initiator of chronic mPTP formation  
425 (Schinder et al., 1996).

426 NMDAR blockade disrupts development of PVI, alters E/I balance, and impairs cognitive  
427 performance (Wang et al., 2008; Jeevakumar and Kroener, 2016). There is strong evidence that  
428 these changes are mediated by oxidative stress (Radonjic et al., 2010; Powell et al., 2012), and  
429 we previously demonstrated that boosting antioxidant defense systems with N-acetyl cysteine  
430 can counter the physiological and behavioral deficits induced by perinatal KET-treatment  
431 (Phensy et al., 2017a). We also found that perinatal KET-treatment significantly increased levels  
432 of mitochondrial-derived ROS and reduced mitochondrial membrane potentials in PVI. These  
433 changes are signs of prolonged mPTP activation, suggesting mitochondria as important nodes  
434 in KET-induced PVI dysfunction. CypD is a necessary component of the mPTP, and reducing  
435 CypD translocation protects mitochondrial function (Du and Yan, 2010). Thus, we hypothesized  
436 that *Ppif*<sup>-/-</sup> mice would be protected from KET-induced increases in oxidative stress and PVI  
437 dysfunction.

438 We measured glutathione levels to determine the redox state of PFC tissue from adult KET- and  
439 SAL-treated mice. The ratio of GSH to GSSG indicates cell redox status, with healthy cells  
440 having a large GSH/GSSG ratio, that drops when they get exposed to oxidative stress  
441 (Pizzorno, 2014). Wildtype KET-treated mice showed a significant decrease in the GSH/GSSG  
442 ratio in PFC. This is in line with previous findings by us (Phensy et al., 2017a) and others  
443 (Powell et al., 2012) which have shown that NMDAR blockade during development drives  
444 oxidative stress in the frontal cortex. We also found increased levels of 4-HNE, a byproduct of  
445 lipid peroxidation, in prefrontal PVI of WT-KET mice. Lipid peroxidation occurs when free  
446 radicals damage lipids and it is an indicator of the damage that results from oxidative stress.

447 *Ppif*<sup>-/-</sup>-KET mice demonstrated robust protection against KET-induced reductions in the  
448 GSH/GSSG ratio and the increase of 4-HNE levels in PVI (Figs 2,3). Because *Ppif*<sup>-/-</sup>-KET mice  
449 also showed no significant loss of PV immunofluorescence in the PFC these results support the  
450 idea that PVI dysfunction results from mitochondrial oxidative stress. Previous reports have  
451 shown that PVI dysfunction following perinatal NMDAR blockade requires activation of NADPH-  
452 oxidase 2 (NOX2) (Behrens et al., 2007; Sorce et al., 2010). Interestingly, there is evidence for  
453 significant crosstalk between mitochondria and NOX2, which can reciprocally drive ROS  
454 production (Dikalov, 2011; Daiber et al., 2017). Thus, our data support these studies and  
455 suggest a complementary mechanism to NOX2-mediated PVI deficits.

456 NMDAR hypofunction in PVI is believed to contribute to aberrant synaptic activity in  
457 schizophrenia (Homayoun and Moghaddam, 2007). NMDARs can be directly inhibited by  
458 oxidizing agents via interaction on a redox-sensitive site on the receptor (Choi and Lipton,  
459 2000). Developmental NMDAR blockade with ketamine leads to both long-lasting increases in  
460 oxidative stress and NMDAR-hypofunction in layer 2/3 prefrontal PVI (Phensy et al., 2017a).  
461 Because *Ppif*<sup>-/-</sup>-KET mice exhibited reduced signs of oxidative stress, we investigated if this was  
462 accompanied by normal NMDAR function in layer 2/3 PVI. Consistent with our previous findings  
463 (Jeevakumar and Kroener, 2016; Phensy et al., 2017a), PVI in layers 2/3 from KET-treated WT  
464 mice showed reduced NMDAR currents. In contrast, *Ppif*<sup>-/-</sup>-KET mice exhibited normal  
465 NMDAR:AMPA current ratios (Figure 4). Because KET-treatment did not affect amplitudes of  
466 AMPA-mediated sEPSCs, this effect of CypD-deletion most likely represents a selective  
467 protection of NMDAR function. Reduced NMDAR activity has significant implications for PVI  
468 function. Gating of NMDARs causes influx of calcium which can help in persistent neuronal  
469 firing (Myme et al., 2003), an important feature of PVI physiology. Blocking NMDAR on PVI has  
470 been shown to impair the generation of gamma oscillations (Jadi et al., 2016), which are crucial  
471 to cognitive function (Fries, 2009; Sohal et al., 2009). Perturbations in gamma oscillations are  
472 believed to result from reduced PVI activity and a shift in the excitation/inhibition (E/I) balance  
473 (Gonzalez-Burgos et al., 2015; Sohal and Rubenstein, 2019). Consistent with the idea of a shift  
474 in the E/I balance, KET-treatment in WT mice lead to a long-lasting reduction in GABAergic  
475 inhibition at pyramidal neurons and increased glutamate release back onto layer 2/3 PVI. In  
476 contrast, in addition to preserved NMDAR function in PVI, *Ppif*<sup>-/-</sup> mice exhibited normal sEPSCs  
477 and mIPSCs in PVI and pyramidal cells, respectively, suggesting that normal E/I balance in the  
478 mPFC network was maintained.

479 Patients with schizophrenia suffer from a number of PFC-dependent cognitive deficits including  
480 disruptions in working memory, social cognition, attention, and cognitive flexibility (Braff et al.,  
481 1991; Gold et al., 1997; Nuechterlein et al., 2004). Evidence from clinical and preclinical models  
482 suggests that NMDAR hypofunction contributes to these deficits (Coyle, 2012; Cohen et al.,  
483 2015): NMDAR blockade can reduce cognitive abilities in healthy patients and exacerbate  
484 deficits in schizophrenia patients (Lahti et al., 1995; Malhotra et al., 1997; Krystal et al., 2002),  
485 and it impairs cognitive flexibility, episodic memory, and social interactions in rodents (Stefani  
486 and Moghaddam, 2005; Powell et al., 2012; Jeevakumar et al., 2015). In order to determine if  
487 CypD-deletion also protects against KET-induced cognitive deficits we examined the  
488 performance of *Ppif*<sup>-/-</sup>-KET mice in a variety of tasks (Figure 6). In rodents, cognitive flexibility is  
489 most often assessed via attentional set-shifting tasks (Young et al., 2012). Here, we measured



490 cognitive flexibility through a rule-shifting task which requires only a simple shift from an  
491 egocentric response strategy to a visual cue-based strategy (Stefani and Moghaddam, 2005;  
492 Floresco et al., 2006). Consistent with previous findings (Stefani and Moghaddam, 2005;  
493 Broberg et al., 2008; Jeevakumar et al., 2015) we found that WT-KET mice required more trials  
494 to shift their strategies and committed a larger number of perseverative errors (Figure 6A-C).  
495 Perseverative errors suggest an inability to abandon a defunct strategy, a deficit that is  
496 frequently observed in patients with schizophrenia (Abbruzzese et al., 1996) or lesions of the  
497 PFC (Barcelo and Knight, 2002). Patients with schizophrenia also suffer from deficits in episodic  
498 memory (Ragland et al., 2009). In rodents, episodic memory can be assessed via the novel  
499 object recognition task. Performance on the task relies heavily on interactions between PFC and  
500 hippocampal circuits (Korotkova et al., 2010), which are disrupted by blockade (Jadi et al.,  
501 2016) or ablation (Korotkova et al., 2010) of NMDARs. Both acute (Rajagopal et al., 2014) and  
502 developmental (Jeevakumar et al., 2015; Phensy et al., 2017b) KET-treatment results in  
503 reduced novel object recognition. Finally, we examined changes in social interaction in KET-  
504 treated WT and *Ppif*<sup>-/-</sup> animals. Reduced social interactions and isolation are negative symptoms  
505 associated with schizophrenia (Millan et al., 2014; Green et al., 2015). Consistent with what we  
506 (Phensy et al., 2017b) and others (Powell et al., 2012) have previously shown, developmental  
507 NMDAR blockade in WT mice reduced social interaction times across all presentations of the  
508 stimulus mice. Importantly, *Ppif*<sup>-/-</sup> mice showed robust protection against all KET-induced  
509 behavioral deficits. These findings strongly suggest that transient NMDAR blockade affects  
510 cortical networks and behavior via processes that depend on proper mitochondrial function, and  
511 that modulation of the mPTP via genetic deletion of CypD can prevent these effects. These  
512 findings are in line with a number of other studies in which genetic deletion or pharmacological  
513 inhibition of CypD has been shown to offer protection against cognitive dysfunction in other  
514 preclinical disease models (Du et al., 2008; Yan et al., 2016; Nusrat et al., 2018). One previous  
515 study reported higher indices of anxiety and a reduced tendency to explore in *Ppif*<sup>-/-</sup> mice  
516 (Luvisetto et al., 2008); however, we did not find evidence for reduced exploration during NOR  
517 or the cross-maze rule-shifting task, nor did we observe any other unspecific phenotypical  
518 changes in *Ppif*<sup>-/-</sup> mice.

519 Taken together, our results underscore the impact of mitochondria on cortical networks and  
520 cognition. Mitochondria not only play essential roles in cell function, but their bioenergetics are  
521 crucial for proper neuronal development (Cobley, 2018), and even acute dysfunction impairs  
522 learning and memory (Mancini and Horvath, 2017). Here we illustrate how CypD activity can  
523 drive mitochondrial dysfunction in PVI and show that CypD may be a potential therapeutic target  
524 in protecting cognitive function in schizophrenia.

525

526 **References**

- 527 Abbruzzese M, Ferri S, Scarone S (1996) Performance on the Wisconsin Card Sorting Test in  
528 schizophrenia: perseveration in clinical subtypes. *Psychiatry Res* 64:27-33.
- 529 Abekawa T, Ito K, Nakagawa S, Koyama T (2007) Prenatal exposure to an NMDA receptor antagonist,  
530 MK-801 reduces density of parvalbumin-immunoreactive GABAergic neurons in the medial  
531 prefrontal cortex and enhances phencyclidine-induced hyperlocomotion but not behavioral  
532 sensitization to methamphetamine in postpubertal rats. *Psychopharmacology* 192:303-316.
- 533 Akbarian S, Huang HS (2006) Molecular and cellular mechanisms of altered GAD1/GAD67 expression in  
534 schizophrenia and related disorders. *Brain research reviews* 52:293-304.
- 535 Altar CA, Jurata LW, Charles V, Lemire A, Liu P, Bukhman Y, Young TA, Bullard J, Yokoe H, Webster MJ,  
536 Knable MB, Brockman JA (2005) Deficient hippocampal neuron expression of proteasome,  
537 ubiquitin, and mitochondrial genes in multiple schizophrenia cohorts. *Biol Psychiatry* 58:85-96.
- 538 Anticevic A, Gancsos M, Murray JD, Repovs G, Driesen NR, Ennis DJ, Niciu MJ, Morgan PT, Surti TS, Bloch  
539 MH, Ramani R, Smith MA, Wang XJ, Krystal JH, Corlett PR (2012) NMDA receptor function in  
540 large-scale anticorrelated neural systems with implications for cognition and schizophrenia.  
541 *Proceedings of the National Academy of Sciences of the United States of America* 109:16720-  
542 16725.
- 543 Baines CP, Kaiser RA, Purcell NH, Blair NS, Osinska H, Hambleton MA, Brunskill EW, Sayen MR, Gottlieb  
544 RA, Dorn GW, Robbins J, Molkentin JD (2005) Loss of cyclophilin D reveals a critical role for  
545 mitochondrial permeability transition in cell death. *Nature* 434:658-662.
- 546 Barcelo F, Knight RT (2002) Both random and perseverative errors underlie WCST deficits in prefrontal  
547 patients. *Neuropsychologia* 40:349-356.
- 548 Basso E, Fante L, Fowlkes J, Petronilli V, Forte MA, Bernardi P (2005) Properties of the permeability  
549 transition pore in mitochondria devoid of Cyclophilin D. *The Journal of biological chemistry*  
550 280:18558-18561.
- 551 Behrens MM, Ali SS, Dao DN, Lucero J, Shekhtman G, Quick KL, Dugan LL (2007) Ketamine-induced loss  
552 of phenotype of fast-spiking interneurons is mediated by NADPH-oxidase. *Science* 318:1645-  
553 1647.
- 554 Belforte JE, Zsiros V, Sklar ER, Jiang Z, Yu G, Li Y, Quinlan EM, Nakazawa K (2010) Postnatal NMDA  
555 receptor ablation in corticolimbic interneurons confers schizophrenia-like phenotypes. *Nat*  
556 *Neurosci* 13:76-83.
- 557 Ben-Shachar D, Laifenfeld D (2004) Mitochondria, synaptic plasticity, and schizophrenia. *International*  
558 *review of neurobiology* 59:273-296.
- 559 Bhatti JS, Bhatti GK, Reddy PH (2017) Mitochondrial dysfunction and oxidative stress in metabolic  
560 disorders - A step towards mitochondria based therapeutic strategies. *Biochim Biophys Acta Mol*  
561 *Basis Dis* 1863:1066-1077.
- 562 Birnbaum R, Jaffe AE, Chen Q, Hyde TM, Kleinman JE, Weinberger DR (2015) Investigation of the  
563 prenatal expression patterns of 108 schizophrenia-associated genetic loci. *Biological psychiatry*  
564 77:e43-51.
- 565 Birrell JM, Brown VJ (2000) Medial frontal cortex mediates perceptual attentional set shifting in the rat.  
566 *The Journal of neuroscience : the official journal of the Society for Neuroscience* 20:4320-4324.
- 567 Braff DL, Heaton R, Kuck J, Cullum M, Moranville J, Grant I, Zisook S (1991) The generalized pattern of  
568 neuropsychological deficits in outpatients with chronic schizophrenia with heterogeneous  
569 Wisconsin Card Sorting Test results. *Arch Gen Psychiatry* 48:891-898.
- 570 Braun I, Genius J, Grunze H, Bender A, Moller HJ, Rujescu D (2007) Alterations of hippocampal and  
571 prefrontal GABAergic interneurons in an animal model of psychosis induced by NMDA receptor  
572 antagonism. *Schizophrenia research* 97:254-263.

- 573 Broberg BV, Dias R, Glenthøj BY, Olsen CK (2008) Evaluation of a neurodevelopmental model of  
574 schizophrenia--early postnatal PCP treatment in attentional set-shifting. *Behav Brain Res*  
575 190:160-163.
- 576 Catts VS, Fung SJ, Long LE, Joshi D, Vercammen A, Allen KM, Fillman SG, Rothmond DA, Sinclair D, Tiwari  
577 Y, Tsai SY, Weickert TW, Shannon Weickert C (2013) Rethinking schizophrenia in the context of  
578 normal neurodevelopment. *Frontiers in cellular neuroscience* 7:60.
- 579 Chen Q, Vazquez EJ, Moghaddas S, Hoppel CL, Lesnefsky EJ (2003) Production of reactive oxygen species  
580 by mitochondria: central role of complex III. *The Journal of biological chemistry* 278:36027-  
581 36031.
- 582 Choi YB, Lipton SA (2000) Redox modulation of the NMDA receptor. *Cell Mol Life Sci* 57:1535-1541.
- 583 Cobley JN (2018) Synapse Pruning: Mitochondrial ROS with Their Hands on the Shears. *Bioessays*  
584 40:e1800031.
- 585 Cohen SM, Tsien RW, Goff DC, Halassa MM (2015) The impact of NMDA receptor hypofunction on  
586 GABAergic neurons in the pathophysiology of schizophrenia. *Schizophr Res* 167:98-107.
- 587 Connern CP, Halestrap AP (1994) Recruitment of mitochondrial cyclophilin to the mitochondrial inner  
588 membrane under conditions of oxidative stress that enhance the opening of a calcium-sensitive  
589 non-specific channel. *The Biochemical journal* 302 ( Pt 2):321-324.
- 590 Coyle JT (2012) NMDA receptor and schizophrenia: a brief history. *Schizophr Bull* 38:920-926.
- 591 Crompton M (2004) Mitochondria and aging: a role for the permeability transition? *Aging cell* 3:3-6.
- 592 Daiber A, Di Lisa F, Oelze M, Kroller-Schon S, Steven S, Schulz E, Munzel T (2017) Crosstalk of  
593 mitochondria with NADPH oxidase via reactive oxygen and nitrogen species signalling and its  
594 role for vascular function. *Br J Pharmacol* 174:1670-1689.
- 595 Dikalov S (2011) Cross talk between mitochondria and NADPH oxidases. *Free Radic Biol Med* 51:1289-  
596 1301.
- 597 Do KQ, Cabungcal JH, Frank A, Steullet P, Cuenod M (2009) Redox dysregulation, neurodevelopment,  
598 and schizophrenia. *Curr Opin Neurobiol* 19:220-230.
- 599 Du H, Yan SS (2010) Mitochondrial medicine for neurodegenerative diseases. *The international journal*  
600 *of biochemistry & cell biology* 42:560-572.
- 601 Du H, Guo L, Fang F, Chen D, Sosunov AA, McKhann GM, Yan Y, Wang C, Zhang H, Molkenstein JD, Gunn-  
602 Moore FJ, Vonsattel JP, Arancio O, Chen JX, Yan SD (2008) Cyclophilin D deficiency attenuates  
603 mitochondrial and neuronal perturbation and ameliorates learning and memory in Alzheimer's  
604 disease. *Nat Med* 14:1097-1105.
- 605 Floresco SB, Magyar O (2006) Mesocortical dopamine modulation of executive functions: beyond  
606 working memory. *Psychopharmacology* 188:567-585.
- 607 Floresco SB, Ghods-Sharifi S, Vexelman C, Magyar O (2006) Dissociable roles for the nucleus accumbens  
608 core and shell in regulating set shifting. *J Neurosci* 26:2449-2457.
- 609 Fries P (2009) Neuronal gamma-band synchronization as a fundamental process in cortical computation.  
610 *Annu Rev Neurosci* 32:209-224.
- 611 Gold JM, Carpenter C, Randolph C, Goldberg TE, Weinberger DR (1997) Auditory working memory and  
612 Wisconsin Card Sorting Test performance in schizophrenia. *Arch Gen Psychiatry* 54:159-165.
- 613 Gonzalez-Burgos G, Cho RY, Lewis DA (2015) Alterations in cortical network oscillations and parvalbumin  
614 neurons in schizophrenia. *Biol Psychiatry* 77:1031-1040.
- 615 Green MF, Horan WP, Lee J (2015) Social cognition in schizophrenia. *Nat Rev Neurosci* 16:620-631.
- 616 Gulsuner S, Walsh T, Watts AC, Lee MK, Thornton AM, Casadei S, Rippey C, Shahin H, Consortium on the  
617 Genetics of S, Group PS, Nimgaonkar VL, Go RC, Savage RM, Swerdlow NR, Gur RE, Braff DL, King  
618 MC, McClellan JM (2013) Spatial and temporal mapping of de novo mutations in schizophrenia  
619 to a fetal prefrontal cortical network. *Cell* 154:518-529.

- 620 Gulyas AI, Buzsaki G, Freund TF, Hirase H (2006) Populations of hippocampal inhibitory neurons express  
621 different levels of cytochrome c. *Eur J Neurosci* 23:2581-2594.
- 622 Halestrap AP (2010) A pore way to die: the role of mitochondria in reperfusion injury and  
623 cardioprotection. *Biochemical Society transactions* 38:841-860.
- 624 Hardingham GE, Do KQ (2016) Linking early-life NMDAR hypofunction and oxidative stress in  
625 schizophrenia pathogenesis. *Nat Rev Neurosci* 17:125-134.
- 626 Harrison PJ, Owen MJ (2003) Genes for schizophrenia? Recent findings and their pathophysiological  
627 implications. *Lancet* 361:417-419.
- 628 Hjelm BE, Rollins B, Mamdani F, Lauterborn JC, Kirov G, Lynch G, Gall CM, Sequeira A, Vawter MP (2015)  
629 Evidence of Mitochondrial Dysfunction within the Complex Genetic Etiology of Schizophrenia.  
630 *Molecular neuropsychiatry* 1:201-219.
- 631 Homayoun H, Moghaddam B (2007) NMDA receptor hypofunction produces opposite effects on  
632 prefrontal cortex interneurons and pyramidal neurons. *J Neurosci* 27:11496-11500.
- 633 Hu W, Morris B, Carrasco A, Kroener S (2015) Effects of acamprosate on attentional set-shifting and  
634 cellular function in the prefrontal cortex of chronic alcohol-exposed mice. *Alcoholism, clinical  
635 and experimental research* 39:953-961.
- 636 Insel TR (2010) Rethinking schizophrenia. *Nature* 468:187-193.
- 637 Iwamoto K, Bundo M, Kato T (2005) Altered expression of mitochondria-related genes in postmortem  
638 brains of patients with bipolar disorder or schizophrenia, as revealed by large-scale DNA  
639 microarray analysis. *Hum Mol Genet* 14:241-253.
- 640 Jadi MP, Behrens MM, Sejnowski TJ (2016) Abnormal Gamma Oscillations in N-Methyl-D-Aspartate  
641 Receptor Hypofunction Models of Schizophrenia. *Biol Psychiatry* 79:716-726.
- 642 Jeevakumar V, Kroener S (2016) Ketamine Administration During the Second Postnatal Week Alters  
643 Synaptic Properties of Fast-Spiking Interneurons in the Medial Prefrontal Cortex of Adult Mice.  
644 *Cereb Cortex* 26:1117-1129.
- 645 Jeevakumar V, Driskill C, Paine A, Sobhanian M, Vakil H, Morris B, Ramos J, Kroener S (2015) Ketamine  
646 administration during the second postnatal week induces enduring schizophrenia-like behavioral  
647 symptoms and reduces parvalbumin expression in the medial prefrontal cortex of adult mice.  
648 *Behav Brain Res* 282:165-175.
- 649 Jiang Z, Cowell RM, Nakazawa K (2013) Convergence of genetic and environmental factors on  
650 parvalbumin-positive interneurons in schizophrenia. *Frontiers in behavioral neuroscience* 7:116.
- 651 Kann O, Kovacs R (2007) Mitochondria and neuronal activity. *American journal of physiology Cell  
652 physiology* 292:C641-657.
- 653 Korotkova T, Fuchs EC, Ponomarenko A, von Engelhardt J, Monyer H (2010) NMDA receptor ablation on  
654 parvalbumin-positive interneurons impairs hippocampal synchrony, spatial representations, and  
655 working memory. *Neuron* 68:557-569.
- 656 Krystal JH, Anand A, Moghaddam B (2002) Effects of NMDA receptor antagonists: implications for the  
657 pathophysiology of schizophrenia. *Arch Gen Psychiatry* 59:663-664.
- 658 Lahti AC, Koffel B, LaPorte D, Tamminga CA (1995) Subanesthetic doses of ketamine stimulate psychosis  
659 in schizophrenia. *Neuropsychopharmacology* 13:9-19.
- 660 Lemasters JJ, Theruvath TP, Zhong Z, Nieminen AL (2009) Mitochondrial calcium and the permeability  
661 transition in cell death. *Biochim Biophys Acta* 1787:1395-1401.
- 662 Lewis DA, Hashimoto T, Volk DW (2005) Cortical inhibitory neurons and schizophrenia. *Nat Rev Neurosci*  
663 6:312-324.
- 664 Lewis DA, Curley AA, Glausier JR, Volk DW (2012) Cortical parvalbumin interneurons and cognitive  
665 dysfunction in schizophrenia. *Trends in neurosciences* 35:57-67.
- 666 Li Z, Okamoto K, Hayashi Y, Sheng M (2004) The importance of dendritic mitochondria in the  
667 morphogenesis and plasticity of spines and synapses. *Cell* 119:873-887.

- 668 Luvisetto S, Basso E, Petronilli V, Bernardi P, Forte M (2008) Enhancement of anxiety, facilitation of  
669 avoidance behavior, and occurrence of adult-onset obesity in mice lacking mitochondrial  
670 cyclophilin D. *Neuroscience* 155:585-596.
- 671 Malhotra AK, Pinals DA, Adler CM, Elman I, Clifton A, Pickar D, Breier A (1997) Ketamine-induced  
672 exacerbation of psychotic symptoms and cognitive impairment in neuroleptic-free  
673 schizophrenics. *Neuropsychopharmacology* 17:141-150.
- 674 Mancini G, Horvath TL (2017) Mitochondria Bioenergetic and Cognitive Functions: The Cannabinoid Link.  
675 *Trends Cell Biol* 27:391-392.
- 676 Millan MJ, Fone K, Steckler T, Horan WP (2014) Negative symptoms of schizophrenia: clinical  
677 characteristics, pathophysiological substrates, experimental models and prospects for improved  
678 treatment. *Eur Neuropsychopharmacol* 24:645-692.
- 679 Myme CI, Sugino K, Turrigiano GG, Nelson SB (2003) The NMDA-to-AMPA ratio at synapses onto layer  
680 2/3 pyramidal neurons is conserved across prefrontal and visual cortices. *J Neurophysiol* 90:771-  
681 779.
- 682 Nakazawa K, Zsiros V, Jiang Z, Nakao K, Kolata S, Zhang S, Belforte JE (2012) GABAergic interneuron  
683 origin of schizophrenia pathophysiology. *Neuropharmacology* 62:1574-1583.
- 684 Nuechterlein KH, Barch DM, Gold JM, Goldberg TE, Green MF, Heaton RK (2004) Identification of  
685 separable cognitive factors in schizophrenia. *Schizophr Res* 72:29-39.
- 686 Nusrat L, Livingston-Thomas JM, Raguthevan V, Adams K, Vonderwalde I, Corbett D, Morshead CM  
687 (2018) Cyclosporin A-Mediated Activation of Endogenous Neural Precursor Cells Promotes  
688 Cognitive Recovery in a Mouse Model of Stroke. *Front Aging Neurosci* 10:93.
- 689 Olney JW, Newcomer JW, Farber NB (1999) NMDA receptor hypofunction model of schizophrenia. *J*  
690 *Psychiatr Res* 33:523-533.
- 691 Pers TH, Timshel P, Ripke S, Lent S, Sullivan PF, O'Donovan MC, Franke L, Hirschhorn JN, Schizophrenia  
692 Working Group of the Psychiatric Genomics C (2016) Comprehensive analysis of schizophrenia-  
693 associated loci highlights ion channel pathways and biologically plausible candidate causal  
694 genes. *Hum Mol Genet* 25:1247-1254.
- 695 Phensy A, Driskill C, Lindquist K, Guo L, Jeevakumar V, Fowler B, Du H, Kroener S (2017a) Antioxidant  
696 Treatment in Male Mice Prevents Mitochondrial and Synaptic Changes in an NMDA Receptor  
697 Dysfunction Model of Schizophrenia. *eNeuro* 4.
- 698 Phensy A, Duzdabanian HE, Brewer S, Panjabi A, Driskill C, Berz A, Peng G, Kroener S (2017b) Antioxidant  
699 Treatment with N-acetyl Cysteine Prevents the Development of Cognitive and Social Behavioral  
700 Deficits that Result from Perinatal Ketamine Treatment. *Front Behav Neurosci* 11:106.
- 701 Pizzorno J (2014) Glutathione! *Integr Med (Encinitas)* 13:8-12.
- 702 Plitman E, Nakajima S, de la Fuente-Sandoval C, Gerretsen P, Chakravarty MM, Kobylanski J, Chung JK,  
703 Caravaggio F, Iwata Y, Remington G, Graff-Guerrero A (2014) Glutamate-mediated excitotoxicity  
704 in schizophrenia: a review. *Eur Neuropsychopharmacol* 24:1591-1605.
- 705 Pocklington AJ, Rees E, Walters JT, Han J, Kavanagh DH, Chambert KD, Holmans P, Moran JL, McCarroll  
706 SA, Kirov G, O'Donovan MC, Owen MJ (2015) Novel Findings from CNVs Implicate Inhibitory and  
707 Excitatory Signaling Complexes in Schizophrenia. *Neuron* 86:1203-1214.
- 708 Powell SB, Sejnowski TJ, Behrens MM (2012) Behavioral and neurochemical consequences of cortical  
709 oxidative stress on parvalbumin-interneuron maturation in rodent models of schizophrenia.  
710 *Neuropharmacology* 62:1322-1331.
- 711 Prabakaran S, Swatton JE, Ryan MM, Huffaker SJ, Huang JT, Griffin JL, Wayland M, Freeman T, Dudbridge  
712 F, Lilley KS, Karp NA, Hester S, Tkachev D, Mimmack ML, Yolken RH, Webster MJ, Torrey EF,  
713 Bahn S (2004) Mitochondrial dysfunction in schizophrenia: evidence for compromised brain  
714 metabolism and oxidative stress. *Molecular psychiatry* 9:684-697, 643.

- 715 Radonjic NV, Knezevic ID, Vilimanovich U, Kravic-Stevovic T, Marina LV, Nikolic T, Todorovic V,  
716 Bumbasirevic V, Petronijevic ND (2010) Decreased glutathione levels and altered antioxidant  
717 defense in an animal model of schizophrenia: long-term effects of perinatal phencyclidine  
718 administration. *Neuropharmacology* 58:739-745.
- 719 Ragland JD, Laird AR, Ranganath C, Blumenfeld RS, Gonzales SM, Glahn DC (2009) Prefrontal activation  
720 deficits during episodic memory in schizophrenia. *Am J Psychiatry* 166:863-874.
- 721 Rajagopal L, Massey BW, Huang M, Oyamada Y, Meltzer HY (2014) The novel object recognition test in  
722 rodents in relation to cognitive impairment in schizophrenia. *Curr Pharm Des* 20:5104-5114.
- 723 Rajasekaran A, Venkatasubramanian G, Berk M, Debnath M (2015) Mitochondrial dysfunction in  
724 schizophrenia: pathways, mechanisms and implications. *Neurosci Biobehav Rev* 48:10-21.
- 725 Rego AC, Oliveira CR (2003) Mitochondrial dysfunction and reactive oxygen species in excitotoxicity and  
726 apoptosis: implications for the pathogenesis of neurodegenerative diseases. *Neurochem Res*  
727 28:1563-1574.
- 728 Schinder AF, Olson EC, Spitzer NC, Montal M (1996) Mitochondrial dysfunction is a primary event in  
729 glutamate neurotoxicity. *The Journal of neuroscience : the official journal of the Society for*  
730 *Neuroscience* 16:6125-6133.
- 731 Sekar A, Bialas AR, de Rivera H, Davis A, Hammond TR, Kamitaki N, Tooley K, Presumey J, Baum M, Van  
732 Doren V, Genovese G, Rose SA, Handsaker RE, Schizophrenia Working Group of the Psychiatric  
733 Genomics C, Daly MJ, Carroll MC, Stevens B, McCarroll SA (2016) Schizophrenia risk from  
734 complex variation of complement component 4. *Nature* 530:177-183.
- 735 Snyder MA, Gao WJ (2013) NMDA hypofunction as a convergence point for progression and symptoms  
736 of schizophrenia. *Front Cell Neurosci* 7:31.
- 737 Sohal VS, Rubenstein JLR (2019) Excitation-inhibition balance as a framework for investigating  
738 mechanisms in neuropsychiatric disorders. *Mol Psychiatry* 24:1248-1257.
- 739 Sohal VS, Zhang F, Yizhar O, Deisseroth K (2009) Parvalbumin neurons and gamma rhythms enhance  
740 cortical circuit performance. *Nature* 459:698-702.
- 741 Sorce S, Schiavone S, Tucci P, Colaianna M, Jaquet V, Cuomo V, Dubois-Dauphin M, Trabace L, Krause KH  
742 (2010) The NADPH oxidase NOX2 controls glutamate release: a novel mechanism involved in  
743 psychosis-like ketamine responses. *J Neurosci* 30:11317-11325.
- 744 Stefani MR, Moghaddam B (2005) Transient N-methyl-D-aspartate receptor blockade in early  
745 development causes lasting cognitive deficits relevant to schizophrenia. *Biol Psychiatry* 57:433-  
746 436.
- 747 Steullet P, Cabungcal JH, Monin A, Dwir D, O'Donnell P, Cuenod M, Do KQ (2016) Redox dysregulation,  
748 neuroinflammation, and NMDA receptor hypofunction: A "central hub" in schizophrenia  
749 pathophysiology? *Schizophr Res* 176:41-51.
- 750 Steullet P, Cabungcal JH, Coyle J, Didriksen M, Gill K, Grace AA, Hensch TK, LaMantia AS, Lindemann L,  
751 Maynard TM, Meyer U, Morishita H, O'Donnell P, Puhl M, Cuenod M, Do KQ (2017) Oxidative  
752 stress-driven parvalbumin interneuron impairment as a common mechanism in models of  
753 schizophrenia. *Mol Psychiatry* 22:936-943.
- 754 Timms AE, Dorschner MO, Wechsler J, Choi KY, Kirkwood R, Girirajan S, Baker C, Eichler EE, Korvatska O,  
755 Roche KW, Horwitz MS, Tsuang DW (2013) Support for the N-methyl-D-aspartate receptor  
756 hypofunction hypothesis of schizophrenia from exome sequencing in multiplex families. *JAMA*  
757 *Psychiatry* 70:582-590.
- 758 Wang CZ, Yang SF, Xia Y, Johnson KM (2008) Postnatal phencyclidine administration selectively reduces  
759 adult cortical parvalbumin-containing interneurons. *Neuropsychopharmacology* 33:2442-2455.
- 760 White RJ, Reynolds IJ (1996) Mitochondrial depolarization in glutamate-stimulated neurons: an early  
761 signal specific to excitotoxin exposure. *The Journal of neuroscience : the official journal of the*  
762 *Society for Neuroscience* 16:5688-5697.

763 Yan S, Du F, Wu L, Zhang Z, Zhong C, Yu Q, Wang Y, Lue LF, Walker DG, Douglas JT, Yan SS (2016) F1F0  
764 ATP Synthase-Cyclophilin D Interaction Contributes to Diabetes-Induced Synaptic Dysfunction  
765 and Cognitive Decline. *Diabetes* 65:3482-3494.

766 Young JW, Amitai N, Geyer MA (2012) Behavioral animal models to assess pro-cognitive treatments for  
767 schizophrenia. *Handb Exp Pharmacol*:39-79.

768 Young JW, Powell SB, Risbrough V, Marston HM, Geyer MA (2009) Using the MATRICS to guide  
769 development of a preclinical cognitive test battery for research in schizophrenia. *Pharmacology  
770 & therapeutics* 122:150-202.

771 Zhang Z, Sun QQ (2011) Development of NMDA NR2 subunits and their roles in critical period  
772 maturation of neocortical GABAergic interneurons. *Developmental neurobiology* 71:221-245.

773

774



775 **Figure legends:**

776

777 **Figure 1.** CypD-deletion (*Ppif*<sup>-/-</sup>) protects against the loss of parvalbumin (PV) expression that  
778 results from perinatal ketamine (KET) treatment. Wildtype (WT) or *Ppif*<sup>-/-</sup> mice received either  
779 saline (SAL) or KET injections on postnatal days 7, 9, and 11. A) Representative confocal  
780 images of PV immunofluorescence (red) and DAPI (blue) from layers 1-6 of adult medial  
781 prefrontal cortex. B) Total PV-positive cells as a percentage of DAPI. Perinatal KET-treatment  
782 significantly reduced PV expression in WT but not in *Ppif*<sup>-/-</sup> mice. Significance is indicated as \**p*  
783 ≤ 0.05, and \*\*\**p* ≤ 0.001, following Tukey correction.

784

785 **Figure 2.** CypD-deletion (*Ppif*<sup>-/-</sup>) reduces perinatal ketamine (KET)-induced oxidative stress in  
786 adult medial prefrontal cortex (mPFC). A) KET-treatment does not affect total glutathione levels.  
787 B) KET-treatment significantly reduces the ratio of the reduced (GSH) over oxidized (GSSG)  
788 form of glutathione in wildtype (WT) mice, indicating increased oxidative stress. KET-treated  
789 *Ppif*<sup>-/-</sup> mice are protected from this shift in the GSH / GSSG ratio. C, D) Total levels of GSH (C)  
790 and GSSG (D) in adult mPFC tissue. Significance is indicated as \**p* ≤ 0.05 and \*\**p* ≤ 0.01,  
791 following Tukey correction.

792

793 **Figure 3.** Perinatal ketamine (KET)-treatment increases oxidative stress in parvalbumin-positive  
794 interneurons (PVI) from wildtype (WT) but not from CypD knockout (*Ppif*<sup>-/-</sup>) mice. A)  
795 Representative confocal images of parvalbumin (PV, green) and 4-HNE (red)  
796 immunofluorescence in the medial prefrontal cortex. B) PV cells in tissue from WT-KET mice  
797 had significantly higher levels of 4HNE, a measure of lipid peroxidation and oxidative stress,  
798 than saline-treated WT mice (WT-SAL). KET-treated *Ppif*<sup>-/-</sup> mice were protected from this  
799 increase. Significance is indicated as \**p* ≤ 0.05, and \*\**p* ≤ 0.01, following Tukey correction.

800

801 **Figure 4.** CypD deletion (*Ppif*<sup>-/-</sup>) protects against alterations in GABA release that develop in the  
802 medial prefrontal cortex following perinatal ketamine (KET)-treatment. A) Representative traces  
803 of miniature IPSCs (in tetrodotoxin) recorded in layer 2/3 pyramidal cells from in the 4 treatment  
804 groups. B) Amplitude distribution of all mIPSC events in the 4 treatment groups. C) KET-  
805 treatment significantly reduced the frequency, but not the amplitude of mIPSCs onto layer 2/3  
806 pyramidal neurons from wildtype (WT) mice. Similar changes were not observed in *Ppif*<sup>-/-</sup>-KET  
807 mice. D) Representative traces of spontaneous IPSCs recorded in layer 2/3 pyramidal cells. E)  
808 Amplitude distribution of all sIPSC events in the 4 treatment groups. F) KET-treatment did not  
809 alter the frequency or amplitude of sIPSCs. Significance is indicated as \**p* ≤ 0.05, and \*\**p* ≤  
810 0.01, following Tukey correction.

811

812 **Figure 5.** Perinatal ketamine (KET)-treatment alters glutamatergic transmission onto layer 2/3  
813 parvalbumin-positive interneurons (PVI) in wildtype (WT), but not in CypD knockout (*Ppif*<sup>-/-</sup>)  
814 mice. A) Representative traces of NMDAR-currents (red) and AMPAR- (black) from GFP+ PVI

815 neurons in layers 2/3 of the medial prefrontal cortex. B) NMDAR:AMPA ratios in the 4  
816 treatment groups. Ketamine-treated WT mice exhibit markedly decreased NMDAR:AMPA  
817 ratios compared to saline (SAL)-treated mice, as well as KET-treated *Ppif*<sup>-/-</sup> mice. C)  
818 Representative traces of spontaneous-EPSCs recorded at -70 mV. D) KET-treatment increased  
819 the frequency, but not the amplitude of sEPSCs in WT mice, but not in *Ppif*<sup>-/-</sup> mice. Significance  
820 is indicated as \* $p \leq 0.05$ , and \*\* $p \leq 0.01$ , following Tukey correction.

821

822 **Figure 6.** Perinatal ketamine (KET)-treatment induced behavioral deficits in wildtype (WT), but  
823 not in CypD knockout (*Ppif*<sup>-/-</sup>) mice. A) Schematic overview of the Cross-Maze Rule Shifting task  
824 used to assess cognitive flexibility. Mice learn an egocentric strategy (Response Discrimination)  
825 in order to obtain a food reward and the next day are required to shift to a visual cue strategy  
826 (Shift to Visual Cue Day). B) All animals learned the initial response strategy at the same rate;  
827 however, WT-KET required a significantly larger number of trials to shift between strategies  
828 compared to saline-treated controls and KET-treated *Ppif*<sup>-/-</sup> mice. C) Error analysis based on  
829 error types committed during the Shift-to-Cue session. WT-KET animals show an increase in  
830 total errors and a significantly higher number of perseverative errors. D) Schematic overview of  
831 the setup used to test novel object recognition (NOR). E) KET-treatment reduced NOR in WT,  
832 but not in *Ppif*<sup>-/-</sup> mice. F) Test of social interaction and recognition. A stimulus mouse is placed in  
833 the home-cage of the test mouse for four 1-minute sessions (10-minute inter-trial-intervals) and  
834 social interaction time is recorded. On a fifth trial, a novel stimulus mouse is introduced to test  
835 social recognition. G) KET-treatment results in reduced interaction times across all sessions.  
836 *Ppif*<sup>-/-</sup>-KET mice patterns of social interaction comparable to saline-treated controls. A-F:  
837 Significance is indicated as \* $p \leq 0.05$ , \*\* $p \leq 0.01$ , and \*\*\* $p \leq 0.001$ , following Tukey correction.  
838 G: Significance is indicated as \* $p \leq 0.05$  WT-SAL vs WT-KET, \*\*\* $p \leq 0.001$  WT-SAL vs WT-KET,  
839 and + $p \leq 0.05$  for WT-KET vs *Ppif*<sup>-/-</sup>-KET following Tukey correction.

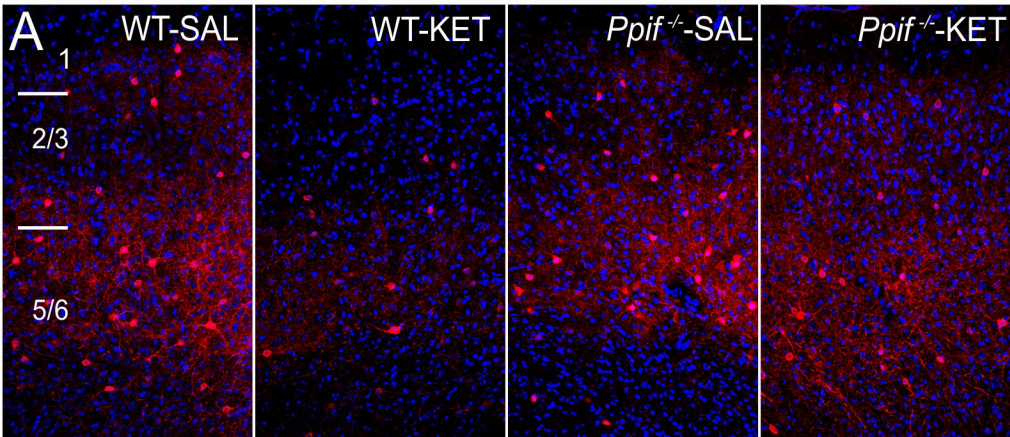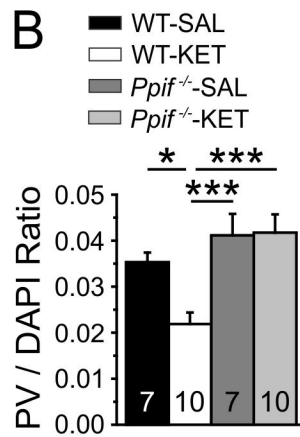

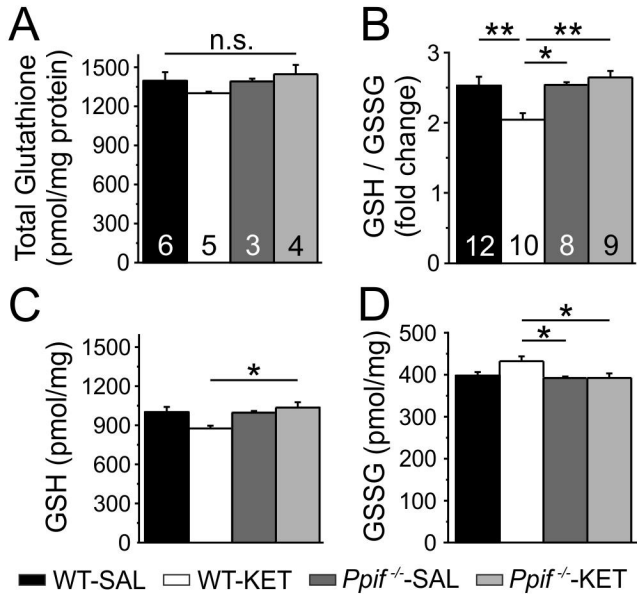

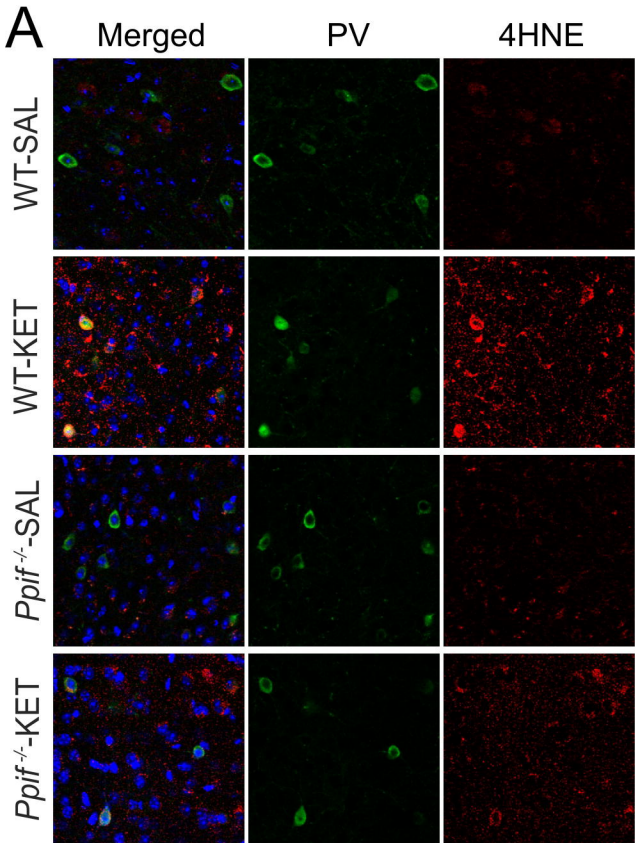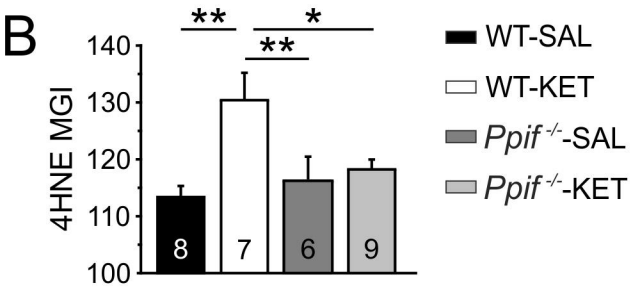

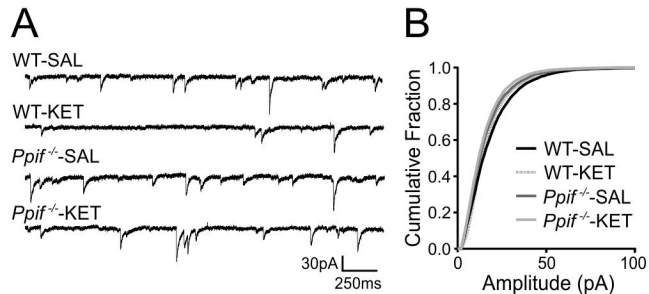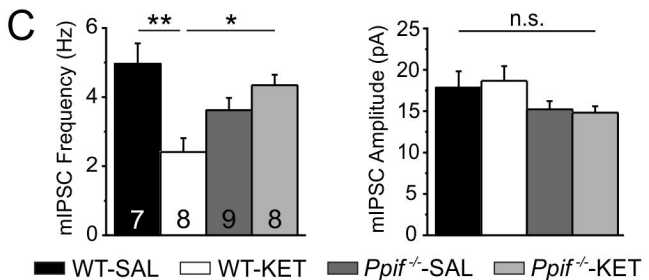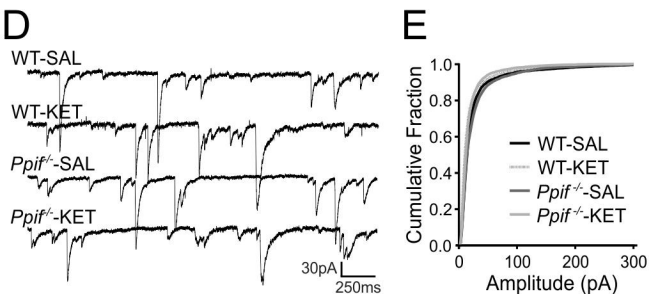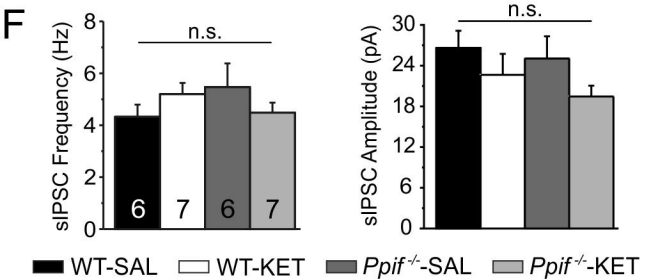

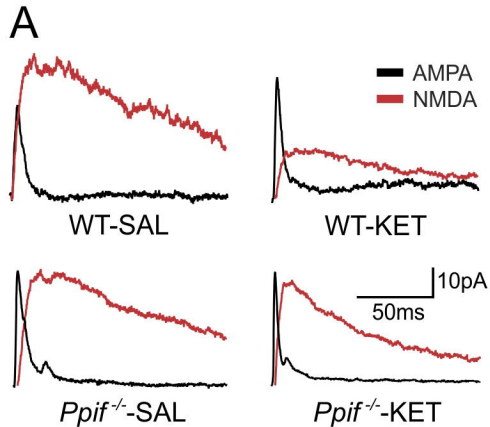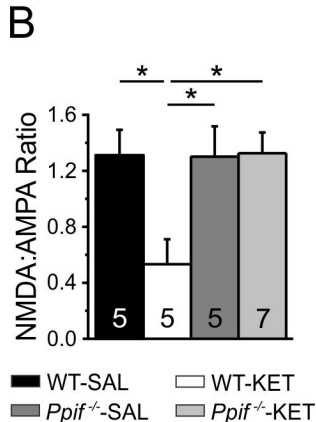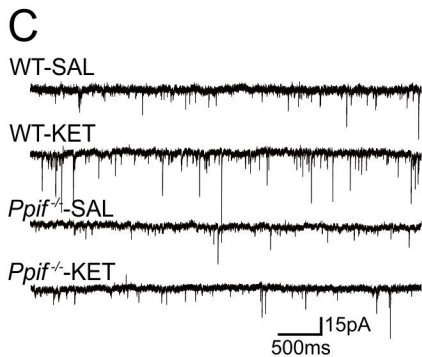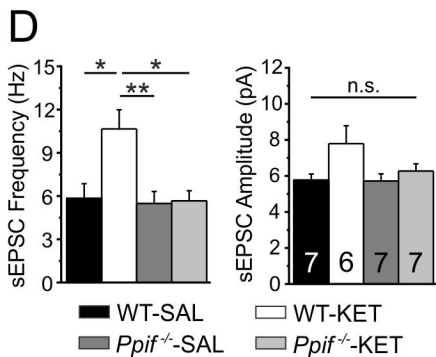



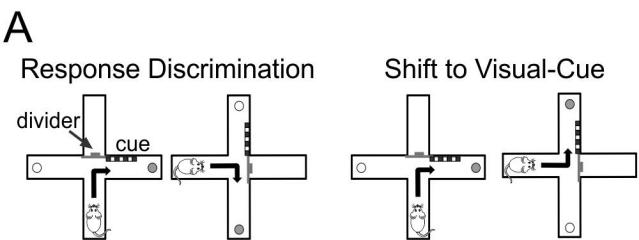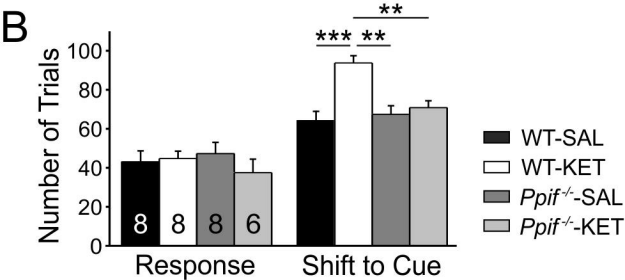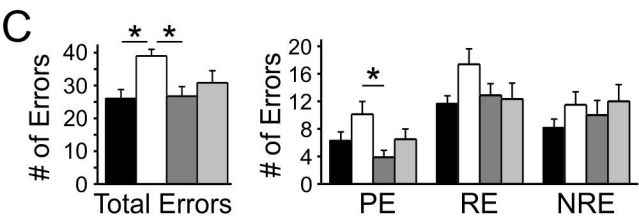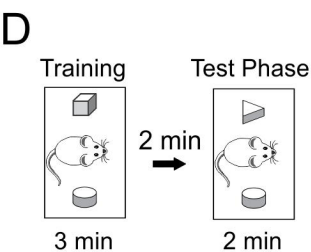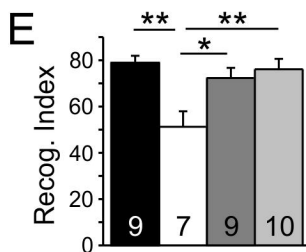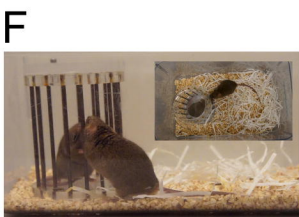

● WT-SAL (8)    ▲ *Ppif*<sup>-/-</sup>-SAL (9)  
○ WT-KET (9)    □ *Ppif*<sup>-/-</sup>-KET (10)

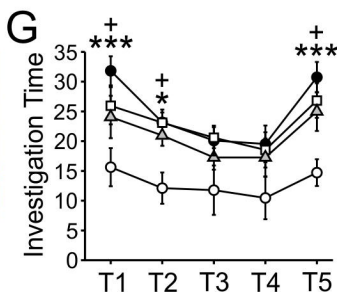

Source: http://biorxiv.org/content/10.1101/2020.04.15.043570v1.full.pdf
